# Supplementary material for: HH130: a standardized database of machine learning interatomic potentials, datasets, and its applications in the thermal transport of half-Heusler thermoelectrics
Source: Royal Society of Chemistry journal article supplement (doi:10.1039/d4dd00240g), 2024-01-01
Supplement: d4dd00240g1.pdf [file d4dd00240g1.pdf]

## Supplementary Information

**Table S1:** 130 half-Heusler (HH) compounds, the IDs on MatHub-3d, calculation time (a 64-core computing node, specifically an AMD EPYC 7452 @2.35GHz), the number of configurations in the HH130 dataset, and  $\kappa_{LS}$  (considering both three and four phonon interactions) of 80 HH compounds at 300 K

| Compound | ID    | MLIP calculation time (h) |          |          |       | Number of configurations | $\kappa_{LS}^{3ph+4ph}$<br>( $\text{W}\cdot\text{m}^{-1}\cdot\text{K}^{-1}$ ) |
|----------|-------|---------------------------|----------|----------|-------|--------------------------|-------------------------------------------------------------------------------|
|          |       | Sampling                  | Labeling | Training | Total |                          |                                                                               |
| BaSnSr   | 84506 | 4.75                      | 150.63   | 13.85    | 169.2 | 307                      | 1.50                                                                          |
| CaSnSr   | 84525 | 4.29                      | 97.77    | 9.38     | 111.4 | 267                      | 2.23                                                                          |
| KSnY     | 84484 | 6.20                      | 182.21   | 20.76    | 209.2 | 277                      | 1.30                                                                          |
| NaSnY    | 84551 | 14.27                     | 66.41    | 15.88    | 96.6  | 312                      |                                                                               |
| BiCePd   | 84407 | 5.14                      | 52.55    | 14.89    | 72.6  | 210                      | 3.08                                                                          |
| PtSnTh   | 84664 | 3.10                      | 48.55    | 12.40    | 64.1  | 180                      | 3.75                                                                          |
| BiRhZr   | 84493 | 4.39                      | 39.72    | 13.29    | 57.4  | 177                      | 9.16                                                                          |
| BaNaSb   | 84540 | 3.07                      | 27.32    | 7.07     | 37.5  | 180                      | 0.74                                                                          |
| BaKP     | 84482 | 3.49                      | 46.35    | 5.94     | 55.8  | 176                      | 2.72                                                                          |
| MgSnSr   | 84486 | 4.80                      | 50.95    | 7.10     | 62.8  | 204                      | 1.39                                                                          |
| BiRhTi   | 84485 | 3.10                      | 24.38    | 8.33     | 35.8  | 140                      | 9.26                                                                          |
| NiSnTh   | 84658 | 2.90                      | 195.50   | 11.86    | 210.3 | 212                      | 5.86                                                                          |
| CaSiSr   | 84574 | 3.51                      | 33.13    | 6.59     | 43.2  | 156                      | 4.40                                                                          |
| CaMgSn   | 84580 | 6.74                      | 39.61    | 11.34    | 57.7  | 206                      | 2.69                                                                          |
| NbRhSn   | 84409 | 6.93                      | 86.89    | 14.31    | 108.1 | 238                      |                                                                               |
| AuScSn   | 84601 | 3.06                      | 60.46    | 9.36     | 72.9  | 151                      | 8.69                                                                          |
| AuInZr   | 84523 | 5.83                      | 28.97    | 9.87     | 44.7  | 135                      | 8.68                                                                          |
| PbPtZr   | 84522 | 4.47                      | 42.66    | 17.46    | 64.6  | 260                      | 6.79                                                                          |
| BiNiY    | 84408 | 3.26                      | 82.04    | 10.17    | 95.5  | 155                      | 6.86                                                                          |
| RhSbTh   | 84667 | 3.19                      | 65.70    | 11.86    | 80.7  | 162                      | 3.40                                                                          |
| PtSnZr   | 84534 | 3.61                      | 48.63    | 14.91    | 67.1  | 175                      | 12.99                                                                         |
| BiGdNi   | 84422 | 3.33                      | 60.85    | 9.69     | 73.9  | 145                      | 8.07                                                                          |
| PdSnZr   | 84447 | 3.41                      | 46.66    | 11.97    | 62.0  | 164                      | 11.78                                                                         |
| BiDyNi   | 84471 | 5.65                      | 77.14    | 9.76     | 92.5  | 171                      |                                                                               |
| HfPbPt   | 84541 | 4.97                      | 31.12    | 22.10    | 58.2  | 249                      |                                                                               |
| BiHoNi   | 84444 | 2.97                      | 84.08    | 7.33     | 94.4  | 149                      | 10.59                                                                         |
| PbPtTi   | 84503 | 17.99                     | 41.92    | 18.33    | 78.2  | 224                      |                                                                               |
| NbPtTi   | 84563 | 25.09                     | 81.58    | 36.76    | 143.4 | 354                      |                                                                               |
| BiNiTm   | 84442 | 3.66                      | 58.30    | 10.57    | 72.5  | 166                      | 11.25                                                                         |
| MgTiY    | 84564 | 36.89                     | 78.34    | 44.82    | 160.1 | 505                      |                                                                               |
| GeNbRh   | 84573 | 43.83                     | 57.79    | 43.21    | 144.8 | 363                      |                                                                               |
| AuGeSc   | 84514 | 3.40                      | 33.76    | 10.89    | 48.1  | 170                      | 11.29                                                                         |

|        |       |       |        |       |       |     |       |
|--------|-------|-------|--------|-------|-------|-----|-------|
| InNbPt | 84559 | 47.35 | 74.42  | 22.02 | 143.8 | 314 |       |
| BiNiSc | 84424 | 10.38 | 50.38  | 8.41  | 69.2  | 187 |       |
| HfPtSn | 84410 | 7.29  | 51.57  | 18.55 | 77.4  | 278 |       |
| CdSiSr | 84513 | 2.37  | 29.15  | 4.82  | 36.3  | 148 | 1.03  |
| HfPdSn | 84460 | 9.11  | 44.40  | 15.79 | 69.3  | 240 |       |
| PtSnTi | 84449 | 28.83 | 100.51 | 33.35 | 162.7 | 370 |       |
| BiCoZr | 84473 | 6.78  | 65.24  | 14.62 | 86.6  | 210 |       |
| PdSnTi | 84571 | 26.93 | 96.18  | 29.83 | 152.9 | 347 |       |
| GePtZr | 84492 | 3.57  | 34.65  | 14.42 | 52.6  | 215 | 11.97 |
| PtTaTl | 84560 | 10.42 | 34.47  | 21.74 | 66.6  | 247 |       |
| GeRhTa | 84505 | 4.47  | 20.15  | 18.67 | 43.3  | 262 |       |
| NiSnZr | 84434 | 2.99  | 53.81  | 11.03 | 67.8  | 173 | 14.71 |
| InPtV  | 84555 | 10.27 | 97.93  | 38.19 | 146.4 | 383 |       |
| MgScTl | 84512 | 64.96 | 58.38  | 41.03 | 164.4 | 485 |       |
| HfNiPb | 84519 | 3.23  | 35.99  | 12.11 | 51.3  | 224 | 12.88 |
| GaNbPt | 84530 | 5.37  | 46.41  | 21.37 | 73.2  | 306 |       |
| GeHfPt | 84533 | 3.00  | 16.24  | 10.83 | 30.1  | 210 |       |
| CaCdSi | 84567 | 6.34  | 40.24  | 24.95 | 71.5  | 277 | 2.76  |
| HfNiSn | 84445 | 4.29  | 63.30  | 14.91 | 82.5  | 258 |       |
| GePtTi | 84458 | 13.60 | 29.16  | 29.21 | 72.0  | 310 |       |
| CoNbSn | 84433 | 28.82 | 142.42 | 46.95 | 218.2 | 390 |       |
| NiSnTi | 84406 | 25.07 | 63.74  | 24.58 | 113.4 | 349 |       |
| NbRuSb | 84597 | 42.37 | 55.23  | 17.91 | 115.5 | 280 |       |
| GaPtTa | 84554 | 8.72  | 31.35  | 48.51 | 88.6  | 376 |       |
| LaNiSb | 84579 | 3.80  | 84.07  | 11.55 | 99.4  | 207 | 1.75  |
| HfRhSb | 84411 | 19.74 | 31.82  | 25.46 | 77.0  | 307 |       |
| AsCaNa | 84581 | 14.66 | 33.19  | 25.96 | 73.8  | 324 |       |
| GeNiZr | 84568 | 4.78  | 40.24  | 17.75 | 62.8  | 227 | 18.36 |
| GaPtV  | 84526 | 7.40  | 40.11  | 18.42 | 65.9  | 220 | 16.39 |
| InNiTa | 84543 | 3.60  | 32.31  | 15.39 | 51.3  | 221 | 10.99 |
| CoLaTe | 84494 | 3.74  | 107.75 | 15.70 | 127.2 | 222 | 0.44  |
| AsRhZr | 84545 | 3.28  | 32.31  | 13.56 | 49.1  | 216 | 19.16 |
| CoTiW  | 84483 | 18.08 | 54.95  | 26.97 | 100.0 | 281 |       |
| RuSbTa | 84450 | 4.23  | 27.97  | 18.43 | 50.6  | 263 |       |
| NaSiY  | 84569 | 4.14  | 23.17  | 14.31 | 41.6  | 248 |       |
| AgCaP  | 84546 | 3.40  | 29.42  | 10.90 | 43.7  | 207 | 0.51  |
| RuSbV  | 84428 | 6.88  | 57.15  | 25.44 | 89.5  | 299 | 13.22 |
| CoSnV  | 84448 | 20.01 | 73.75  | 27.30 | 121.1 | 291 |       |
| DyPtSb | 84431 | 5.35  | 37.24  | 20.08 | 62.7  | 242 | 4.75  |
| CaNiTe | 84499 | 3.77  | 43.38  | 11.26 | 58.4  | 192 | 0.81  |
| HoPdSb | 84456 | 3.45  | 41.06  | 12.43 | 56.9  | 220 | 6.38  |
| PtSbSc | 84479 | 4.61  | 39.02  | 18.77 | 62.4  | 244 | 9.85  |
| ErPdSb | 84416 | 4.66  | 45.06  | 16.18 | 65.9  | 236 | 6.88  |
| PdSbSc | 84593 | 4.19  | 34.22  | 17.11 | 55.5  | 206 | 11.54 |

|        |       |       |        |       |       |     |       |
|--------|-------|-------|--------|-------|-------|-----|-------|
| PdSbTm | 84430 | 4.37  | 37.41  | 16.70 | 58.5  | 228 | 7.15  |
| AsHfRh | 84586 | 6.71  | 33.22  | 40.68 | 80.6  | 384 |       |
| NiSbY  | 84440 | 2.76  | 68.54  | 10.56 | 81.9  | 201 | 8.01  |
| AsRhTi | 84487 | 5.36  | 26.71  | 20.69 | 52.8  | 269 | 27.14 |
| GeNiTi | 84542 | 6.03  | 33.54  | 22.11 | 61.7  | 326 |       |
| BiLiMg | 84596 | 5.51  | 31.25  | 38.51 | 75.3  | 248 | 4.18  |
| GaNiV  | 84583 | 6.00  | 43.29  | 23.53 | 72.8  | 289 | 15.58 |
| NiSbTb | 84467 | 3.64  | 70.66  | 13.08 | 87.4  | 210 | 7.47  |
| DyNiSb | 84453 | 2.99  | 58.25  | 9.70  | 70.9  | 197 | 7.73  |
| OsTeTi | 84538 | 7.49  | 45.01  | 36.03 | 88.5  | 311 | 17.78 |
| HoNiSb | 84438 | 4.47  | 123.96 | 15.58 | 144.0 | 251 | 8.31  |
| ErNiSb | 84423 | 2.76  | 67.99  | 7.14  | 77.9  | 183 | 8.64  |
| NiSbTm | 84414 | 3.69  | 59.30  | 12.29 | 75.3  | 218 | 8.53  |
| PtSiZr | 84481 | 3.35  | 24.94  | 13.89 | 42.2  | 207 | 11.72 |
| NiSbSc | 84432 | 3.48  | 42.85  | 12.11 | 58.4  | 204 | 12.12 |
| LuNiSb | 84425 | 4.50  | 93.96  | 14.48 | 112.9 | 239 | 9.20  |
| PdSiZr | 84509 | 4.67  | 32.07  | 21.98 | 58.7  | 242 | 18.49 |
| CoSbZr | 84436 | 5.40  | 55.78  | 20.16 | 81.3  | 251 | 21.83 |
| FeTeZr | 84566 | 4.53  | 55.64  | 16.16 | 76.3  | 216 | 18.52 |
| AgLiTe | 84557 | 4.91  | 24.71  | 14.82 | 44.4  | 220 | 1.29  |
| AlNbPt | 84570 | 5.24  | 47.34  | 25.83 | 78.4  | 312 |       |
| CoScTe | 84496 | 3.83  | 51.02  | 13.77 | 68.6  | 210 | 12.39 |
| NiPY   | 84508 | 2.99  | 51.79  | 12.85 | 67.6  | 204 | 2.78  |
| MgSiSr | 84535 | 4.18  | 21.62  | 13.96 | 39.8  | 214 | 2.94  |
| FeNbSb | 84427 | 6.74  | 63.92  | 27.84 | 98.5  | 317 |       |
| LiNaTe | 84495 | 9.09  | 20.09  | 15.26 | 44.4  | 333 |       |
| HfPtSi | 84575 | 8.14  | 20.35  | 20.45 | 48.9  | 286 |       |
| AlPtTa | 84561 | 4.39  | 13.75  | 9.59  | 27.7  | 194 |       |
| CoHfSb | 84466 | 4.38  | 37.47  | 19.58 | 61.4  | 268 |       |
| AsCaLi | 84517 | 3.38  | 17.91  | 14.81 | 36.1  | 236 | 2.60  |
| PtSiTi | 84498 | 5.37  | 29.02  | 25.96 | 60.4  | 297 |       |
| CoSbTi | 84609 | 5.56  | 30.01  | 14.86 | 50.4  | 206 | 22.28 |
| FeTeTi | 84539 | 5.30  | 40.72  | 26.67 | 72.7  | 272 | 24.39 |
| PdSiTi | 84510 | 15.31 | 31.98  | 38.75 | 86.0  | 337 |       |
| AsCoZr | 84488 | 3.21  | 35.59  | 14.19 | 53.0  | 210 | 19.76 |
| FeSbTa | 84584 | 4.15  | 29.69  | 17.02 | 50.9  | 222 |       |
| FeSbV  | 84589 | 5.62  | 46.72  | 31.56 | 83.9  | 288 | 23.14 |
| AgBZr  | 84489 | 2.58  | 18.51  | 8.77  | 29.9  | 148 | 14.56 |
| NiPSc  | 84480 | 3.99  | 29.68  | 15.76 | 49.4  | 196 | 9.34  |
| HfNiSi | 84490 | 4.54  | 26.32  | 16.33 | 47.2  | 235 |       |
| CdLiP  | 84439 | 2.47  | 10.40  | 8.14  | 21.0  | 145 | 3.51  |
| FeSeTi | 84502 | 3.39  | 27.63  | 15.64 | 46.7  | 211 | 24.86 |
| AsCoTi | 84562 | 5.43  | 34.87  | 20.91 | 61.2  | 271 | 33.16 |
| AlNiV  | 84537 | 6.99  | 44.38  | 33.29 | 84.7  | 294 |       |

|        |       |      |       |       |      |     |       |
|--------|-------|------|-------|-------|------|-----|-------|
| LiScSi | 84511 | 3.81 | 15.50 | 12.43 | 31.8 | 212 | 20.40 |
| AsLiZn | 84446 | 3.54 | 14.39 | 13.96 | 31.9 | 185 | 3.81  |
| GaLiSi | 84426 | 7.01 | 10.69 | 35.91 | 53.6 | 324 |       |
| LiPZn  | 84472 | 5.47 | 13.99 | 21.53 | 41.0 | 249 | 5.63  |
| MgNaP  | 84565 | 7.80 | 11.15 | 31.01 | 50.0 | 342 |       |
| LiNZn  | 84478 | 4.56 | 8.08  | 19.73 | 32.4 | 169 | 12.04 |
| AsLiMg | 84452 | 4.48 | 6.63  | 16.37 | 27.5 | 211 | 6.96  |
| LiMgP  | 84590 | 3.71 | 5.28  | 15.47 | 24.5 | 217 | 6.52  |
| AlLiSi | 84417 | 6.30 | 6.62  | 29.39 | 42.3 | 280 |       |
| LiMgN  | 84527 | 4.93 | 5.22  | 31.25 | 41.4 | 250 |       |

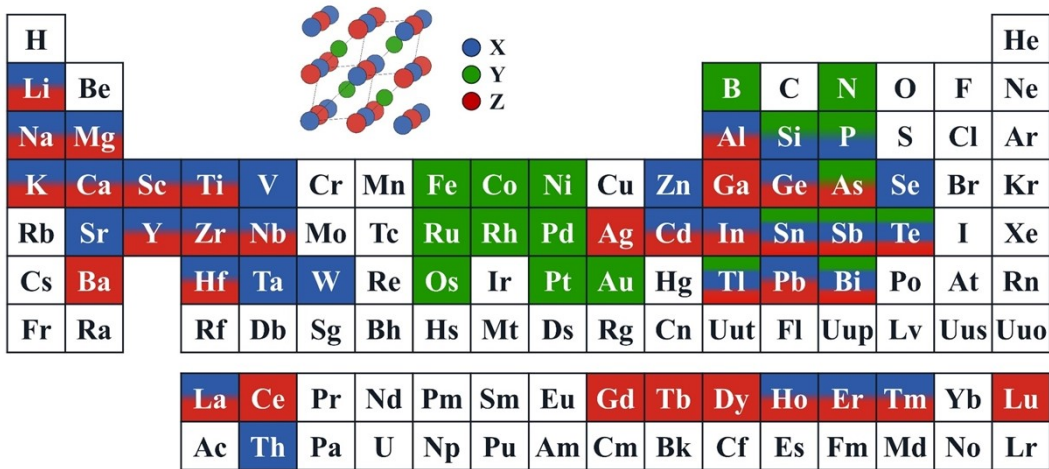

**Figure S1:** The crystal structure of half-Heusler and the elements considered in this study.

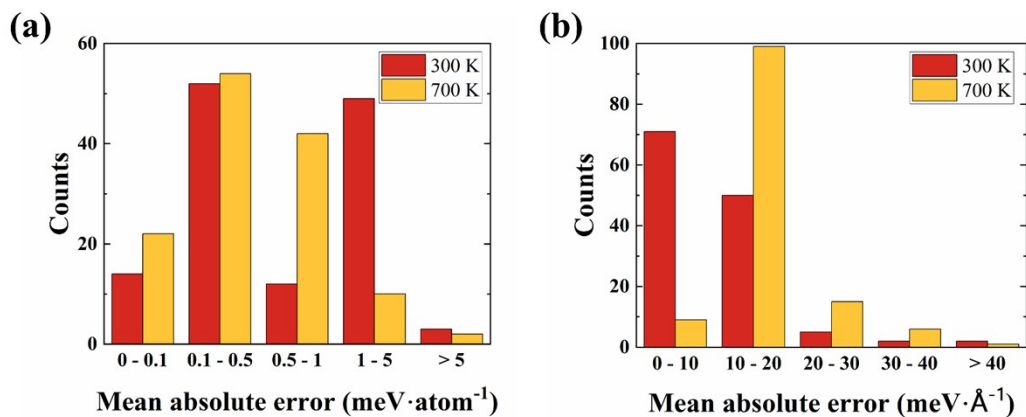

**Figure S2:** The MAEs of (a) energies and (b) forces at 300 K (red bar) and 700 K (yellow bar) for 130 HH compounds.

## Supplementary Note 1:

### Testing the level and cutoff radius of the MTP model

To evaluate the training level of MTP models, three models were directly constructed using a comprehensive training dataset of 206 configurations of TiCoSb. The average training time and errors in energies and forces across all configurations were statistically analyzed. Level testing was conducted on a 24-core computing node, with two Intel® Xeon® Gold 6126 CPU @ 2.60 GHz, with all parameters unchanged except for the training level. As shown in Table S2, increasing the level from 16 to 18 resulted in a slight increase in training time and a reduction in errors. However, beyond level 18, further increments nearly doubled the training time while the rate of error reduction remained consistent. Therefore, a training level of 18 was deemed optimal for MTP models in this study.

**Table S2:** Evaluation of the MTP model training level for TiCoSb

| Level | Training time<br>(min) | MAEs of the energies<br>(meV·atom <sup>-1</sup> ) | MAEs of the forces<br>(meV·Å <sup>-1</sup> ) |
|-------|------------------------|---------------------------------------------------|----------------------------------------------|
| 16    | 76                     | 2.524                                             | 9.75                                         |
| 18    | 87                     | 2.521                                             | 8.53                                         |
| 20    | 155                    | 2.520                                             | 7.44                                         |
| 22    | 329                    | 2.515                                             | 6.70                                         |

The cutoff radius of the MTP model was tested on a 24-core computing node, with two Intel® Xeon® Silver 4310 CPUs @ 2.10 GHz. As shown in Table S3, increasing the radius from 5.5 Å to 6.0 Å resulted in minimal changes in both average training time and energy errors, with a slight reduction in force errors. However, beyond a radius of 6.0 Å, further increases led to a significant increase in training time, while the rate of reduction in force errors remained consistent. Additionally, considering the crystal structures of HH compounds and their atomic interaction ranges, we statistically analyzed the atomic nearest-neighbor distances for 130 HH compounds, finding average distances of 5.24 Å, 6.32 Å, and 6.88 Å for the third, fourth, and fifth nearest neighbors, respectively. Therefore, to balance computational efficiency and model

accuracy, selecting a 6.0 Å cutoff radius for training the MTP model is reasonable, as it effectively covers critical nearest-neighbor interactions while avoiding unnecessary computational costs.

**Table S3:** Evaluation of the MTP model cutoff radius for TiCoSb

| Cutoff radius<br>(Å) | Training time<br>(min) | MAEs of the energies<br>(meV·atom <sup>-1</sup> ) | MAEs of the forces<br>(meV·Å <sup>-1</sup> ) |
|----------------------|------------------------|---------------------------------------------------|----------------------------------------------|
| 5.5                  | 99                     | 2.524                                             | 8.74                                         |
| 6.0                  | 98                     | 2.525                                             | 8.53                                         |
| 6.5                  | 130                    | 2.523                                             | 8.12                                         |
| 7.0                  | 183                    | 2.517                                             | 7.93                                         |

### Supplementary Note 2:

#### Comparison of the efficiency of MLIP and DFT calculations

Table S4 presents the average time allocated to each phase of the high-throughput calculation for 130 HH compounds, including sampling, labeling, training, and total time. The computational resources utilized were a 64-core computing node, specifically an AMD EPYC 7452 @ 2.35 GHz. DFT labeling constitutes 64% of the total computational time, making it the most time-consuming component. On average, the entire MLIP process for each HH compound requires 75 hours, with the training dataset containing an average of 245 configurations.

**Table S4:** The time spent on each component in high-throughput calculations

| Sampling time (h) | Labeling time (h) | Training time (h) | Total (h) |
|-------------------|-------------------|-------------------|-----------|
| 8                 | 48                | 19                | 75        |

Based on the trained MLIP models, atomic forces can be directly obtained from small displacement structures, allowing for the rapid acquisition of high-order IFCs and a significant reduction in high-throughput computational costs. As shown in Table S5, the efficiency difference between DFT and MLIP is quantified by the number of DFT

calculations required. For a 192-atom HH supercell, considering the cutoff distance settings described in the main text, approximately 500 and 2000 DFT calculations are needed to obtain 3<sup>rd</sup>- and 4<sup>th</sup>-order IFCs, respectively. Using the average number of configurations in the training dataset as a reference (with an average of 245 static DFT calculations per HH compound), the entire process of training the MLIP model and obtaining 3<sup>rd</sup>- and 4<sup>th</sup>-order IFCs is estimated to require 383 DFT calculations. This is slightly fewer than the number of DFT calculations needed for 3<sup>rd</sup>-order IFCs alone. Incorporating 4ph scattering, the MLIP model reduces the originally required 2500 DFT calculations to only 383, resulting in a reduction in computational time by an IFC of magnitude.

**Table S5:** Estimation of the number of DFT calculations required for each process

| 3 <sup>rd</sup> -order IFCs | 4 <sup>th</sup> -order IFCs | DFT Labeling | MLIP Process |
|-----------------------------|-----------------------------|--------------|--------------|
| 500                         | 2000                        | 245          | 383          |

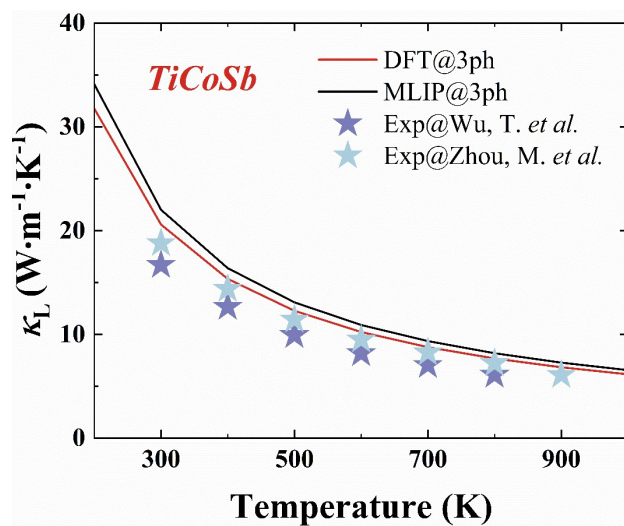

**Figure S3:** The  $\kappa_L$  of theoretical and experimental data for TiCoSb. Experimental data are taken from Wu *et al.*<sup>1</sup> and Zhou *et al.*<sup>2</sup>

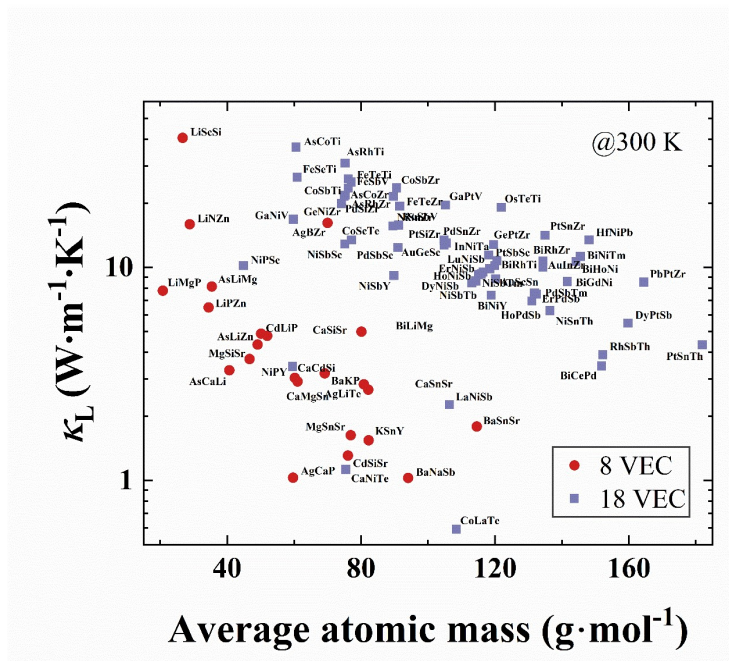

**Figure S4:** The relationship between the  $\kappa_L^{3ph}$  of 80 HH compounds with 8 (red plot) and 18 (blue-purple plot) VEC at 300 K and their average atomic mass.

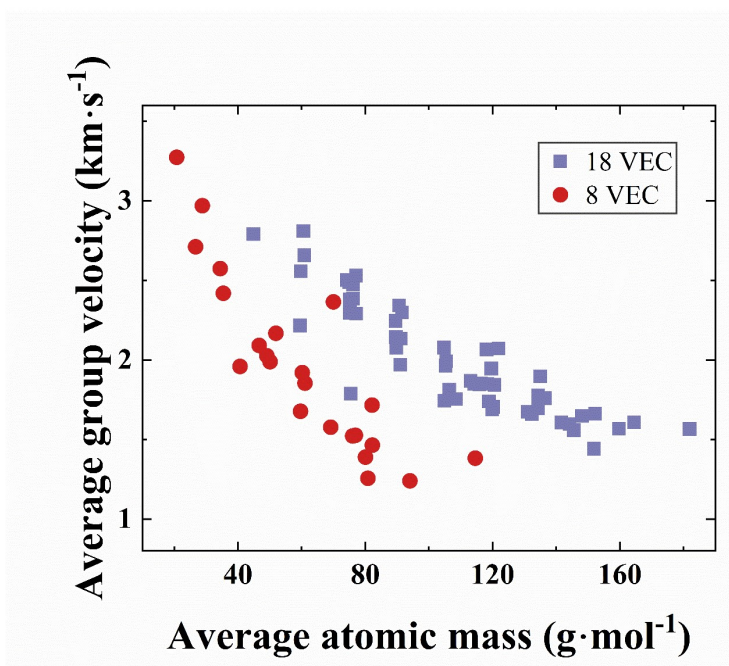

**Figure S5:** The relationship between the average group velocity of 80 HH compounds with 8 (red plot) and 18 (blue-purple plot) VEC and their average atomic mass.



### Supplementary Note 3:

#### The methodology for averaging the 2<sup>nd</sup>-order IFCs

In this study, we calculated and ranked the magnitudes of all 2<sup>nd</sup>-order IFCs for each HH compound. Due to the significant influence of interatomic distances on atomic forces, the 2<sup>nd</sup>-order IFCs of the first few nearest neighboring atoms are significantly larger, typically one to two orders of magnitude greater than those of the next nearest neighbors. This disparity in magnitudes underscores the importance of considering the strongest interactions in the material. Consequently, we computed the equivalent average 2<sup>nd</sup>-order IFCs based on the three largest values, aiming to capture the most influential and dominant contributions to interatomic forces.

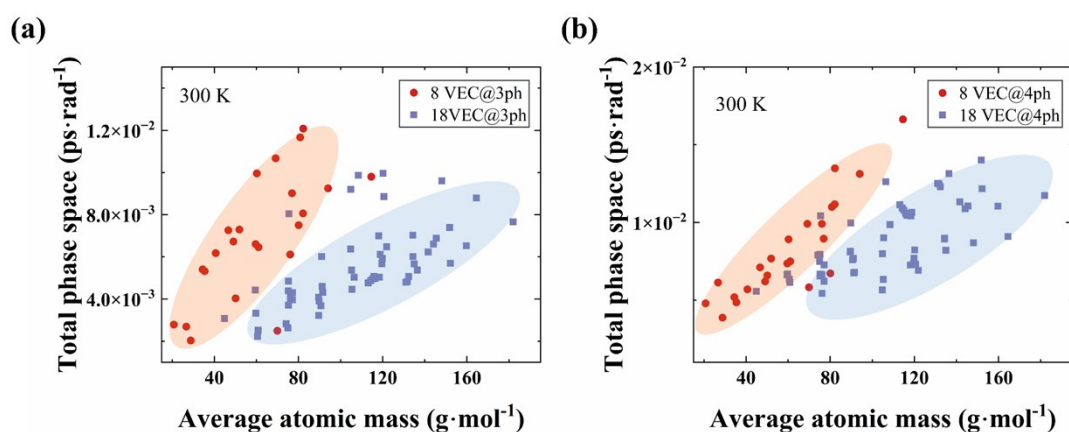

**Figure S6:** The relationship between the (a) 3ph and (b) 4ph total phase space of 80 HH compounds with 8 (red plot) and 18 (blue-purple plot) VEC at 300 K and the average atomic mass.

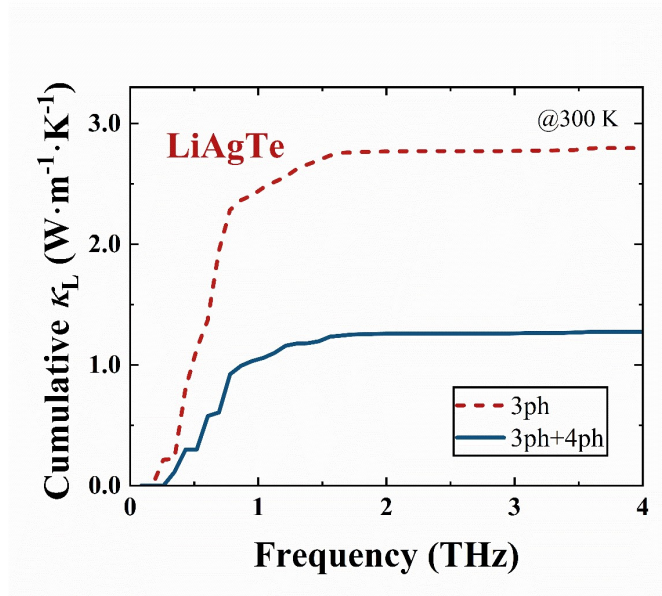

**Figure S7:** The cumulative  $\kappa_L$  for LiAgTe at 300 K as a function of frequency, with (blue line) and without (red dashed line) 4ph scattering.

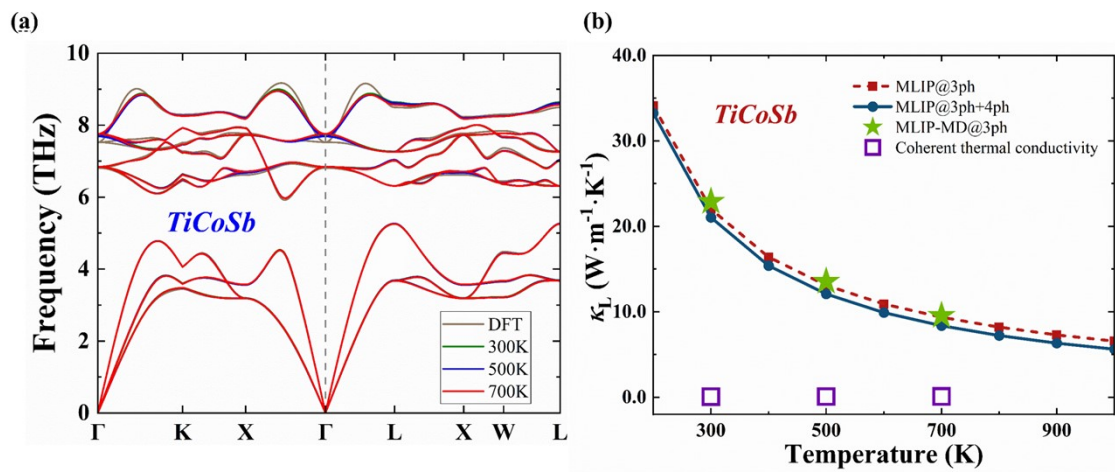

**Figure S8:** The impact of phonon renormalization at finite temperatures on (a) phonon dispersions, (b) lattice thermal conductivity results and coherent thermal transport effects for TiCoSb.

## References

1. T. Wu, W. Jiang, X. Li, S. Bai, S. Liufu and L. Chen, *J. Alloys Compd.*, 2009, **467**, 590-594.
2. M. Zhou, L. Chen, C. Feng, D. Wang and J.-F. Li, *J. Appl. Phys.*, 2007, **101**, 113714.
